# Supplementary material
Source: PubMed Central journal article supplement (PMC6304937)
Supplement: pnas.1810946115.sapp.pdf [file pnas.1810946115.sapp.pdf]

## Supplementary Information for

### Biparental Inheritance of Mitochondrial DNA in Humans

Shiyu Luo, C. Alexander Valencia, Jinglan Zhang, Ni-Chung Lee, Jesse Slone, Baoheng Gui, Xinjian Wang, Zhuo Li, Sarah Dell, Jenice Brown, Stella Maris Chen, Yin-Hsiu Chien, Wuh-Liang Hwu, Pi-Chuan Fan, Lee-Jun Wong, Paldeep S. Atwal, and Taosheng Huang

Corresponding author: Taosheng Huang

Email: [Taosheng.Huang@cchmc.org](mailto:Taosheng.Huang@cchmc.org)

#### **This PDF file includes:**

Figs. S1 to S10  
Captions for Datasets S1 to S3  
Tables S1-S3

#### **Other supplementary materials for this manuscript include the following:**

Datasets S1 to S3

## Sequence alignment

Click a single sequence link below to show details or click [here to show details for all](#)

Show  entries

[Copy](#) [CSV](#) [Excel](#) [PDF](#) [Print](#)

| Sequence | PT17 Haplogroup  | Total Variants | Variants                                                                                                                                                                                                                                                                                                                                                                                                                                              |
|----------|------------------|----------------|-------------------------------------------------------------------------------------------------------------------------------------------------------------------------------------------------------------------------------------------------------------------------------------------------------------------------------------------------------------------------------------------------------------------------------------------------------|
| II-40    | U5b<br>(U5b1d1c) | 30             | A73G, <b>C150T</b> , A263G, A750G, A1438G, A2179G, A2706G, <b>T3197C</b> , A4769G, <b>C5437T</b> , <b>A5656G</b> , C7028T, <b>A7788G</b> , <b>G7912A</b> , A8860G, <b>G9477A</b> , <b>A11467G</b> , G11719A, <b>A12308G</b> , <b>G12372A</b> , <b>T13617C</b> , <b>T14182C</b> , C14766T, A15326G, <b>A15631G</b> , <b>T15721C</b> , <b>C16192T</b> , <b>C16218T</b> , <b>C16270T</b> , <b>C16320T</b> <a href="#">Submit New Variants to Mitomap</a> |

Showing 1 to 1 of 1 entries

[Previous](#) [1](#) [Next](#)

**Fig. S1.** The 30 SNPs in II-40's mtDNA (Family A) differing from the reference mtDNA haplogroup were predicted in Mitomaster. Haplogroup U5b (U5b1d1c)-related mtDNA variants are labeled in red rectangles.

## Sequence alignment

Click a single sequence link below to show details or click [here to show details for all](#)

Show  entries

[Copy](#) [CSV](#) [Excel](#) [PDF](#) [Print](#)

| Sequence | PT17 Haplogroup | Total Variants | Variants                                                                                                                                                                                       |
|----------|-----------------|----------------|------------------------------------------------------------------------------------------------------------------------------------------------------------------------------------------------|
| I-10     | H1a<br>(H1a1)   | 13             | <b>A73G</b> , A263G, A750G, A1438G, <b>G3010A</b> , A4769G, <b>T6365C</b> , A8860G, G14198A, A15326G, <b>A16162G</b> , <b>T16209C</b> , T16519C <a href="#">Submit New Variants to Mitomap</a> |

Showing 1 to 1 of 1 entries

[Previous](#) [1](#) [Next](#)

**Fig. S2.** The 13 SNPs in I-10's mtDNA (Family A) differing from the reference mtDNA haplogroup were predicted in Mitomaster. Haplogroup H1a (H1a1)-related mtDNA variants are labeled in red rectangles in addition to other defining SNPs (2706A, 7028C).

## Sequence alignment

Click a single sequence link below to show details or click [here to show details for all](#)

Show  entries

[Copy](#) [CSV](#) [Excel](#) [PDF](#) [Print](#)

| Sequence | PT17 Haplogroup | Total Variants | Variants                                                                                                                                                                                                                                                            |
|----------|-----------------|----------------|---------------------------------------------------------------------------------------------------------------------------------------------------------------------------------------------------------------------------------------------------------------------|
| I-1      | R0a<br>(R0a1)   | 19             | <b>T58C</b> , <b>C64T</b> , A263G, A750G, <b>A827G</b> , A1438G, <b>T2442C</b> , A2706G, <b>T3847C</b> , A4769G, G6182A, C7028T, A8860G, <b>C13188T</b> , C14766T, A15326G, <b>T16126C</b> , C16291T, <b>T16362C</b> <a href="#">Submit New Variants to Mitomap</a> |

Showing 1 to 1 of 1 entries

[Previous](#) [1](#) [Next](#)

**Fig. S3.** The 19 SNPs in I-1's mtDNA (Family A) differing from the reference mtDNA haplogroup were predicted in Mitomaster. Haplogroup R0a (R0a1)-related mtDNA variants are labeled in red rectangles.

## Sequence alignment

Click a single sequence link below to show details or click [here to show details for all](#)

Show  entries

[Copy](#) [CSV](#) [Excel](#) [PDF](#) [Print](#)

| Sequence | PT17 Haplogroup | Total Variants | Variants                                                                                                                                                                                                                                                                                                                                    |
|----------|-----------------|----------------|---------------------------------------------------------------------------------------------------------------------------------------------------------------------------------------------------------------------------------------------------------------------------------------------------------------------------------------------|
| I-1      | K1b<br>(K1b2a)  | 34             | A73G, T146C, T195C, A263G, A750G, T1189C, A1438G, A1811G, A2706G, A3480G, A4769G, G5913A, C7028T, A8860G, G9055A, A9058G, A9066C, T19698C, A10398G, A10550G, T11299C, A11467G, G11719A, A12308G, G12372A, T12738G, G12771A, C14167T, C14766T, T14798C, A15326G, T16224C, T16311C, T16519C<br><a href="#">Submit New Variants to Mitomap</a> |

Showing 1 to 1 of 1 entries

[Previous](#) [1](#) [Next](#)

**Fig. S4.** The 34 SNPs in I-1's mtDNA (Family B) differing from the reference mtDNA haplogroup were predicted in Mitomaster. Haplogroup K1b (K1b2a)-related mtDNA variants are labeled in red rectangles.

## Sequence alignment

Click a single sequence link below to show details or click [here to show details for all](#)

Show  entries

[Copy](#) [CSV](#) [Excel](#) [PDF](#) [Print](#)

| Sequence | PT17 Haplogroup | Total Variants | Variants                                                                                                                 |
|----------|-----------------|----------------|--------------------------------------------------------------------------------------------------------------------------|
| I-10     | H<br>(H)        | 9              | A263G, A750G, A1438G, G1927A, G3531A, A4769G, A8860G, A15326G, T16519C<br><a href="#">Submit New Variants to Mitomap</a> |

Showing 1 to 1 of 1 entries

[Previous](#) [1](#) [Next](#)

**Fig. S5.** The nine SNPs in I-10's mtDNA (Family B) differing from the reference mtDNA haplogroup were predicted in Mitomaster. Haplogroup H is defined by mtDNA genotype of 73A, 2706A, 7028C, 11719G and 14766C.

## Sequence alignment

Click a single sequence link below to show details or click [here to show details for all](#)

Show  entries

[Copy](#) [CSV](#) [Excel](#) [PDF](#) [Print](#)

| Sequence | PT17 Haplogroup | Total Variants | Variants                                                                                                                                                                                                                                                                                                                                       |
|----------|-----------------|----------------|------------------------------------------------------------------------------------------------------------------------------------------------------------------------------------------------------------------------------------------------------------------------------------------------------------------------------------------------|
| II-30    | T2a<br>(T2a1a)  | 34             | A73G, A263G, G709A, A750G, A1438G, G1588A, A2706G, T2850C, T4216C, A4769G, A4917G, T7022C, C7028T, G8697A, A8860G, T10463C, A11251G, G11719A, A11812G, G13368A, T13965C, A14233G, A14687G, C14766T, G14905A, C15040T, A15326G, C15452A, A15607G, G15928A, T16126C, C16294T, C16296T, T16519C<br><a href="#">Submit New Variants to Mitomap</a> |

Showing 1 to 1 of 1 entries

[Previous](#) [1](#) [Next](#)

**Fig. S6.** The 34 SNPs in II-30's mtDNA (Family B) differing from the reference mtDNA haplogroup were predicted in Mitomaster. Haplogroup T2a (T2a1a)-related mtDNA variants are labeled in red rectangle.

## Sequence alignment

Click a single sequence link below to show details or click [here](#) to show details for all.

Show  entries

[Copy](#) [CSV](#) [Excel](#) [PDF](#) [Print](#)

| Sequence                             | Predicted Haplogroup | Total Variants | Variants                                                                                                                                                                                                                                                                                                                                 |                                   |
|--------------------------------------|----------------------|----------------|------------------------------------------------------------------------------------------------------------------------------------------------------------------------------------------------------------------------------------------------------------------------------------------------------------------------------------------|-----------------------------------|
| <a href="#">F3-GF-mitomaster.dna</a> | K2b<br>(K2b1a1a)     | 34             | A73G, T146C, A263G,<br>A750G, A1438G,<br>A1811G, C2217T<br>A2706G, A3480G,<br>A4769G, G5231A,<br>C7028T, A8860G,<br>G9055A, T9698C,<br>T9716C, A10550G,<br>T11299C, A11467G,<br>G11719A, C11869A,<br>A12308G, G12372A,<br>G13135A, A14037G<br>C14167T, C14766T,<br>T14798C, A15326G,<br>C16222T, T16224C,<br>C16270T, T16311C<br>T16519C | <a href="#">Alignment Details</a> |

**Fig. S7.** The 34 SNPs in I-1's mtDNA (Family C) differing from the reference mtDNA haplogroup were predicted in Mitomaster. Haplogroup K2b (K2b1a1a)-related mtDNA variants are labeled in red rectangle.

## Sequence alignment

Click a single sequence link below to show details or click [here](#) to show details for all.

Show  entries

[Copy](#) [CSV](#) [Excel](#) [PDF](#) [Print](#)

| Sequence                             | Predicted Haplogroup | Total Variants | Variants                                                                                                                                                                                                                                                                                                                                                                                      |                                   |
|--------------------------------------|----------------------|----------------|-----------------------------------------------------------------------------------------------------------------------------------------------------------------------------------------------------------------------------------------------------------------------------------------------------------------------------------------------------------------------------------------------|-----------------------------------|
| <a href="#">F3-GM-mitomaster.dna</a> | J2a<br>(J2a1a1a2)    | 41             | A73G, T146C, C150T<br>T152C, T195C<br>A215G, A263G,<br>C295T, T319C,<br>T489C, G513A,<br>A750G, A1438G,<br>T1850C, A2706G,<br>A3447G, T4216C<br>A4769G, C7028T,<br>C7476T, G7789A<br>A8860G, A10398G,<br>A10499C, A11251G<br>G11377A, G11719A,<br>A11818G, A12612G<br>G13708A, A13722G<br>A14133G, C14766T,<br>G15257A, A15326G,<br>C15452A, C16069T,<br>T16126C, G16145A<br>T16231C, C16261T | <a href="#">Alignment Details</a> |

**Fig. S8.** The 41 SNPs in I-10's mtDNA (Family C) differing from the reference mtDNA haplogroup were predicted in Mitomaster. Haplogroup J2a (J2a1a1a2)-related mtDNA variants are labeled in red rectangle.

## Sequence alignment

Click a single sequence link below to show details or click [here](#) to show details for all.

Show  entries

Copy CSV Excel PDF Print

| Sequence                                 | Predicted Haplogroup | Total Variants | Variants                                                                                                                                                                                                                                                                                                                                                                                                                                                                       |
|------------------------------------------|----------------------|----------------|--------------------------------------------------------------------------------------------------------------------------------------------------------------------------------------------------------------------------------------------------------------------------------------------------------------------------------------------------------------------------------------------------------------------------------------------------------------------------------|
| <a href="#">F3-mother-mitomaster.dna</a> | K2a<br>(K2a7)        | 35             | A73G, <b>T146C</b> , <b>T152C</b> ,<br>A263G, C315CC,<br>CA514d, <b>G709A</b> ,<br>A750G, A1438G,<br><b>A1811G</b> , A2706G,<br><b>A3480G</b> , <b>T4561C</b> ,<br>A4769G, C7028T,<br>G8292A, A8860G,<br><b>G9055A</b> , <b>T9698C</b> ,<br>T9716C, A10550G,<br><b>T11299C</b> , <b>A11467G</b> ,<br>G11719A, <b>A12308G</b> ,<br><b>C12346T</b> , <b>G12372A</b> ,<br>C14167T, C14766T,<br><b>T14798C</b> , A15326G,<br>A16066G, <b>T16224C</b> ,<br><b>T16311C</b> , T16519C |

[Alignment Details](#)

**Fig. S9.** The 35 SNPs in II-30's mtDNA (Family C) differing from the reference mtDNA haplogroup were predicted in Mitomaster. Haplogroup K2a (K2a7)-related mtDNA variants are labeled in red rectangle.

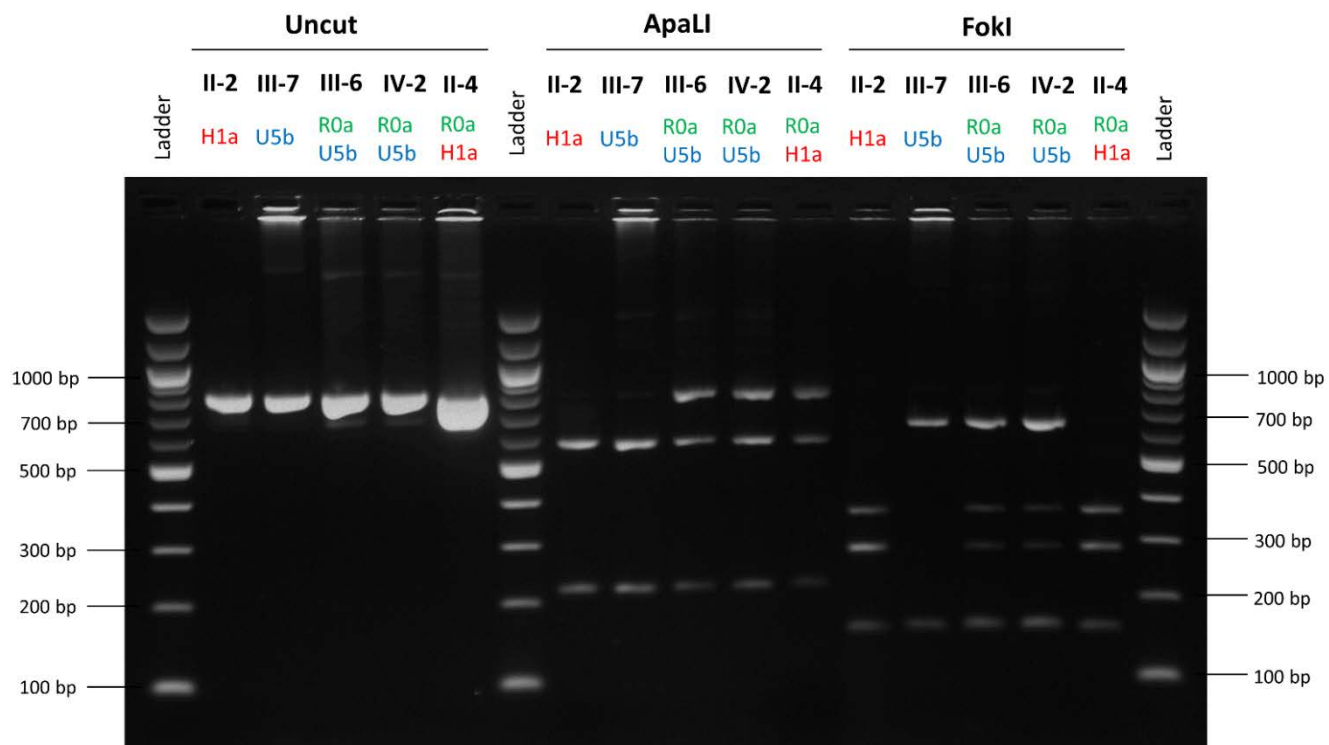

**Fig. S10.** RFLP analysis of selected members of Family A confirms the existence of the haplogroups detected by NGS. The haplogroups present in each individual are as indicated (“R0a” = R0a1, “H1a” = H1a1, and “U5b” = U5b1d1c). RFLP was performed on a 789 bp

PCR product covering positions 16426 to 626 in the human mitochondrial reference genome, which includes the hypervariable region HV2. The expected digest pattern for ApaLI is 789 bp for R0a1 and 572 bp and 217 bp for H1a1 and U5b1d1c. For FokI, the expected digest pattern is 632 bp and 157 bp for U5b1d1c and 355 bp, 277 bp, and 157 bp for R0a1 and H1a1.

**Dataset S1. Comparison of mtDNA sequences of 11 family members in Family A.** The mtDNA sequences were aligned with reference sequence- the human mitochondrial sequence reference NC\_012920.1. SNPs were identified and submitted to MitoMaster for variant calls. All de novo SNPs were labeled with gray color and not included for analysis of mtDNA inheritance pattern in this family.

**Dataset S2. Comparison of mtDNA sequences of five family members in Family B.** The mtDNA sequences were aligned with reference sequence- the human mitochondrial sequence reference NC\_012920.1. SNPs were identified and submitted to MitoMaster for variant calls.

**Dataset S3. Comparison of mtDNA sequences of five family members in Family C.** The mtDNA sequences were aligned with reference sequence- the human mitochondrial sequence reference NC\_012920.1. SNPs were identified and submitted to MitoMaster for variant calls.

**Table S1. Alignment of a total of 46 differential mtDNA variants in family A**

| rCRS Position  | Reference | Variant | I-1 <sup>(D)</sup> | I-10 <sup>(D)</sup> /II-2/III-3 | II-1/II-3/II-4           | II-40/III-7           | III-6/IV-1/IV-2/IV-3       |
|----------------|-----------|---------|--------------------|---------------------------------|--------------------------|-----------------------|----------------------------|
| 58             | T         | C       | <u>C</u>           | T                               | <sup>C/</sup> T          | T                     | <sup>C/</sup> T            |
| 64             | C         | T       | <u>T</u>           | C                               | <sup>T</sup> C           | C                     | <sup>T</sup> C             |
| 73             | A         | G       | A                  | <u>G</u>                        | <sup>A/</sup> G          | G                     | <sup>A/</sup> G            |
| 150            | C         | T       | C                  | C                               | C                        | <u>T</u>              | <sup>C/</sup> T            |
| 263            | A         | G       | G                  | G                               | G                        | G                     | G                          |
| 750            | A         | G       | G                  | G                               | G                        | G                     | G                          |
| 827            | A         | G       | <u>G</u>           | A                               | <sup>G/</sup> A          | A                     | <sup>G/</sup> A            |
| 1438           | A         | G       | G                  | G                               | G                        | G                     | G                          |
| 2179           | A         | G       | A                  | A                               | A                        | G                     | <sup>A/</sup> G            |
| 2442           | T         | C       | <u>C</u>           | T                               | <sup>C/</sup> T          | T                     | <sup>C/</sup> T            |
| 2706           | A         | G       | G                  | A                               | <sup>G/</sup> A          | G                     | G                          |
| 3010           | G         | A       | G                  | <u>A</u>                        | <sup>G/</sup> A          | G                     | G                          |
| 3197           | T         | C       | T                  | <u>T</u>                        | T                        | <u>C</u>              | <sup>T</sup> C             |
| 3847           | T         | C       | <u>C</u>           | T                               | <sup>C/</sup> T          | T                     | <sup>C/</sup> T            |
| 4769           | A         | G       | G                  | G                               | G                        | G                     | G                          |
| 5437           | C         | T       | C                  | C                               | C                        | <u>T</u>              | <sup>C/</sup> T            |
| 5656           | A         | G       | A                  | A                               | A                        | <u>G</u>              | <sup>A/</sup> G            |
| 6182           | G         | A       | A                  | G                               | <sup>A/</sup> G          | G                     | <sup>A/</sup> G            |
| 6365           | T         | C       | T                  | <u>C</u>                        | <sup>T</sup> C           | T                     | T                          |
| 7028           | C         | T       | T                  | C                               | <sup>T</sup> C           | T                     | T                          |
| 7768           | A         | G       | A                  | A                               | A                        | <u>G</u>              | <sup>A/</sup> G            |
| 7912           | G         | A       | G                  | G                               | G                        | <u>A</u>              | <sup>G/</sup> A            |
| 8860           | A         | G       | G                  | G                               | G                        | G                     | G                          |
| 9477           | G         | A       | G                  | G                               | G                        | <u>A</u>              | <sup>G/</sup> A            |
| 11467          | A         | G       | A                  | A                               | A                        | <u>G</u>              | <sup>A/</sup> G            |
| 11719          | G         | A       | G                  | G                               | G                        | A                     | <sup>G/</sup> A            |
| 12308          | A         | G       | A                  | A                               | A                        | <u>G</u>              | <sup>A/</sup> G            |
| 12372          | G         | A       | G                  | G                               | G                        | <u>A</u>              | <sup>G/</sup> A            |
| 13188          | C         | T       | <u>T</u>           | C                               | <sup>T</sup> C           | C                     | <sup>T</sup> C             |
| 13617          | T         | C       | T                  | T                               | T                        | <u>C</u>              | <sup>T</sup> C             |
| 14182          | T         | C       | T                  | T                               | T                        | <u>C</u>              | <sup>T</sup> C             |
| 14198          | G         | A       | G                  | A                               | <sup>G/</sup> A          | G                     | G                          |
| 14766          | C         | T       | T                  | C                               | <sup>T</sup> C           | T                     | T                          |
| 15326          | A         | G       | G                  | G                               | G                        | G                     | G                          |
| 15631          | A         | G       | A                  | A                               | A                        | <u>G</u>              | <sup>A/</sup> G            |
| 15721          | T         | C       | T                  | T                               | T                        | <u>C</u>              | <sup>T</sup> C             |
| 16126          | T         | C       | <u>C</u>           | T                               | <sup>C/</sup> T          | T                     | <sup>C/</sup> T            |
| 16162          | A         | G       | A                  | <u>G</u>                        | <sup>A/</sup> G          | A                     | A                          |
| 16192          | C         | T       | C                  | C                               | C                        | <u>T</u>              | <sup>C/</sup> T            |
| 16209          | T         | C       | T                  | <u>C</u>                        | <sup>T</sup> C           | T                     | T                          |
| 16218          | C         | T       | C                  | C                               | C                        | <u>T</u>              | <sup>C/</sup> T            |
| 16270          | C         | T       | C                  | C                               | C                        | <u>T</u>              | <sup>C/</sup> T            |
| 16291          | C         | T       | T                  | C                               | <sup>T</sup> C           | C                     | <sup>T</sup> C             |
| 16320          | C         | T       | C                  | C                               | C                        | <u>T</u>              | <sup>C/</sup> T            |
| 16362          | T         | C       | <u>C</u>           | T                               | <sup>C/</sup> T          | T                     | <sup>C/</sup> T            |
| 16519          | T         | C       | T                  | C                               | <sup>T</sup> C           | T                     | T                          |
| Heteroplasmy % |           |         | <b>100</b>         | <b>100</b>                      | <sup>40/</sup> <b>60</b> | <b>100</b>            | <sup>40/</sup> <b>60</b>   |
| Haplogroup     |           |         | <u><b>R0a1</b></u> | <u><b>H1a1</b></u>              | <u><b>R0a1/H1a1</b></u>  | <u><b>U5b1d1c</b></u> | <u><b>R0a1/U5b1d1c</b></u> |

Entries labeled (D) represent deduced mtDNA genotypes. Haplogroup related nucleotides have been underlined in the table.



**Table S2. Alignment of a total of 58 differential mtDNA variants in family B**

| rCRS Position  | Reference | Variant | I-1 <sup>(D)</sup> | I-10 <sup>(D)</sup> | II-3           | II-30/III-1/III-5 | III-2              |
|----------------|-----------|---------|--------------------|---------------------|----------------|-------------------|--------------------|
| 73             | A         | G       | <u>G</u>           | <u>A</u>            | <u>G/A</u>     | <u>G</u>          | <u>G</u>           |
| 146            | T         | C       | <u>C</u>           | <u>T</u>            | <u>C/T</u>     | <u>T</u>          | <u>C/T</u>         |
| 195            | T         | C       | <u>C</u>           | <u>T</u>            | <u>C/T</u>     | <u>T</u>          | <u>C/T</u>         |
| 263            | A         | G       | <u>G</u>           | <u>G</u>            | <u>G</u>       | <u>G</u>          | <u>G</u>           |
| 709            | G         | A       | <u>G</u>           | <u>G</u>            | <u>G</u>       | <u>A</u>          | <u>G/A</u>         |
| 750            | A         | G       | <u>G</u>           | <u>G</u>            | <u>G</u>       | <u>G</u>          | <u>G</u>           |
| 1189           | T         | C       | <u>C</u>           | <u>T</u>            | <u>C/T</u>     | <u>T</u>          | <u>C/T</u>         |
| 1438           | A         | G       | <u>G</u>           | <u>G</u>            | <u>G</u>       | <u>G</u>          | <u>G</u>           |
| 1811           | A         | G       | <u>G</u>           | <u>A</u>            | <u>G/A</u>     | <u>A</u>          | <u>G/A</u>         |
| 1888           | G         | A       | <u>G</u>           | <u>G</u>            | <u>G</u>       | <u>A</u>          | <u>G/A</u>         |
| 1927           | G         | A       | <u>G</u>           | <u>A</u>            | <u>G/A</u>     | <u>G</u>          | <u>G</u>           |
| 2706           | A         | G       | <u>G</u>           | <u>A</u>            | <u>G/A</u>     | <u>G</u>          | <u>G</u>           |
| 2850           | T         | C       | <u>T</u>           | <u>T</u>            | <u>T</u>       | <u>C</u>          | <u>T/C</u>         |
| 3480           | A         | G       | <u>G</u>           | <u>A</u>            | <u>G/A</u>     | <u>A</u>          | <u>G/A</u>         |
| 3531           | G         | A       | <u>G</u>           | <u>A</u>            | <u>G/A</u>     | <u>G</u>          | <u>G</u>           |
| 4216           | T         | C       | <u>T</u>           | <u>T</u>            | <u>T</u>       | <u>C</u>          | <u>T/C</u>         |
| 4769           | A         | G       | <u>G</u>           | <u>G</u>            | <u>G</u>       | <u>G</u>          | <u>G</u>           |
| 4917           | A         | G       | <u>A</u>           | <u>A</u>            | <u>A</u>       | <u>G</u>          | <u>A/G</u>         |
| 5913           | G         | A       | <u>A</u>           | <u>G</u>            | <u>A/G</u>     | <u>G</u>          | <u>A/G</u>         |
| 7022           | T         | C       | <u>T</u>           | <u>T</u>            | <u>T</u>       | <u>C</u>          | <u>T/C</u>         |
| 7028           | C         | T       | <u>T</u>           | <u>C</u>            | <u>T/C</u>     | <u>T</u>          | <u>T</u>           |
| 8697           | G         | A       | <u>G</u>           | <u>G</u>            | <u>G</u>       | <u>A</u>          | <u>G/A</u>         |
| 8860           | A         | G       | <u>G</u>           | <u>G</u>            | <u>G</u>       | <u>G</u>          | <u>G</u>           |
| 9055           | G         | A       | <u>A</u>           | <u>G</u>            | <u>A/G</u>     | <u>G</u>          | <u>A/G</u>         |
| 9058           | A         | G       | <u>G</u>           | <u>A</u>            | <u>G/A</u>     | <u>A</u>          | <u>G/A</u>         |
| 9066           | A         | C       | <u>C</u>           | <u>A</u>            | <u>C/A</u>     | <u>A</u>          | <u>C/A</u>         |
| 9698           | T         | C       | <u>C</u>           | <u>T</u>            | <u>C/T</u>     | <u>T</u>          | <u>C/T</u>         |
| 10398          | A         | G       | <u>G</u>           | <u>A</u>            | <u>G/A</u>     | <u>A</u>          | <u>G/A</u>         |
| 10463          | T         | C       | <u>T</u>           | <u>T</u>            | <u>T</u>       | <u>C</u>          | <u>T/C</u>         |
| 10550          | A         | G       | <u>G</u>           | <u>A</u>            | <u>G/A</u>     | <u>A</u>          | <u>G/A</u>         |
| 11251          | A         | G       | <u>A</u>           | <u>A</u>            | <u>A</u>       | <u>G</u>          | <u>A/G</u>         |
| 11299          | T         | C       | <u>C</u>           | <u>T</u>            | <u>C/T</u>     | <u>T</u>          | <u>C/T</u>         |
| 11467          | A         | G       | <u>G</u>           | <u>A</u>            | <u>G/A</u>     | <u>A</u>          | <u>G/A</u>         |
| 11719          | G         | A       | <u>A</u>           | <u>G</u>            | <u>A/G</u>     | <u>A</u>          | <u>A</u>           |
| 11812          | A         | G       | <u>A</u>           | <u>A</u>            | <u>A</u>       | <u>G</u>          | <u>A/G</u>         |
| 12308          | A         | G       | <u>G</u>           | <u>A</u>            | <u>G/A</u>     | <u>A</u>          | <u>G/A</u>         |
| 12372          | G         | A       | <u>A</u>           | <u>G</u>            | <u>A/G</u>     | <u>G</u>          | <u>A/G</u>         |
| 12738          | T         | G       | <u>G</u>           | <u>T</u>            | <u>G/T</u>     | <u>T</u>          | <u>G/T</u>         |
| 12771          | G         | A       | <u>A</u>           | <u>G</u>            | <u>A/G</u>     | <u>G</u>          | <u>A/G</u>         |
| 13368          | G         | A       | <u>G</u>           | <u>G</u>            | <u>G</u>       | <u>A</u>          | <u>G/A</u>         |
| 13965          | T         | C       | <u>T</u>           | <u>T</u>            | <u>T</u>       | <u>C</u>          | <u>T/C</u>         |
| 14167          | C         | T       | <u>T</u>           | <u>C</u>            | <u>T/C</u>     | <u>C</u>          | <u>T/C</u>         |
| 14233          | A         | G       | <u>A</u>           | <u>A</u>            | <u>A</u>       | <u>G</u>          | <u>A/G</u>         |
| 14687          | A         | G       | <u>A</u>           | <u>A</u>            | <u>A</u>       | <u>G</u>          | <u>A/G</u>         |
| 14766          | C         | T       | <u>T</u>           | <u>C</u>            | <u>T/C</u>     | <u>T</u>          | <u>T</u>           |
| 14798          | T         | C       | <u>C</u>           | <u>T</u>            | <u>C/T</u>     | <u>T</u>          | <u>C/T</u>         |
| 14905          | G         | A       | <u>G</u>           | <u>G</u>            | <u>G</u>       | <u>A</u>          | <u>G/A</u>         |
| 15040          | C         | T       | <u>C</u>           | <u>C</u>            | <u>C</u>       | <u>T</u>          | <u>C/T</u>         |
| 15326          | A         | G       | <u>G</u>           | <u>G</u>            | <u>G</u>       | <u>G</u>          | <u>G</u>           |
| 15452          | C         | A       | <u>C</u>           | <u>C</u>            | <u>C</u>       | <u>A</u>          | <u>C/A</u>         |
| 15607          | A         | G       | <u>A</u>           | <u>A</u>            | <u>A</u>       | <u>G</u>          | <u>A/G</u>         |
| 15928          | G         | A       | <u>G</u>           | <u>G</u>            | <u>G</u>       | <u>A</u>          | <u>G/A</u>         |
| 16126          | T         | C       | <u>T</u>           | <u>T</u>            | <u>T</u>       | <u>C</u>          | <u>T/C</u>         |
| 16224          | T         | C       | <u>C</u>           | <u>T</u>            | <u>C/T</u>     | <u>T</u>          | <u>C/T</u>         |
| 16294          | C         | T       | <u>C</u>           | <u>C</u>            | <u>C</u>       | <u>T</u>          | <u>C/T</u>         |
| 16296          | C         | T       | <u>C</u>           | <u>C</u>            | <u>C</u>       | <u>T</u>          | <u>C/T</u>         |
| 16311          | T         | C       | <u>C</u>           | <u>T</u>            | <u>C/T</u>     | <u>T</u>          | <u>C/T</u>         |
| 16519          | T         | C       | <u>C</u>           | <u>C</u>            | <u>C</u>       | <u>C</u>          | <u>C</u>           |
| Heteroplasmy % |           |         | <b>100</b>         | <b>100</b>          | <b>28/72</b>   | <b>100</b>        | <b>51/49</b>       |
| Haplogroup     |           |         | <u>K1b2a</u>       | <u>H</u>            | <u>K1b2a/H</u> | <u>T2a1a</u>      | <u>K1b2a/T2a1a</u> |

Entries labeled (D) represent deduced mtDNA genotypes. Haplogroup related nucleotides have been underlined in the table.

Table S3. Alignment of a total of 68 differential mtDNA variants in family C

| rCRS Position  | Reference | Variant | I-1 <sup>(D)</sup> | I-10 <sup>(D)</sup> | II-3                    | II-30       | III-6/III-7/IV-1    | rCRS Position  | Reference | Variant | I-1 <sup>(D)</sup> | I-10 <sup>(D)</sup> | II-3                    | II-30       | III-6/III-7/IV-1    |
|----------------|-----------|---------|--------------------|---------------------|-------------------------|-------------|---------------------|----------------|-----------|---------|--------------------|---------------------|-------------------------|-------------|---------------------|
| 73             | A         | G       | <u>G</u>           | <u>G</u>            | <u>G</u>                | <u>G</u>    | <u>G</u>            | 10550          | A         | G       | <u>G</u>           | <u>A</u>            | <u>G/A</u>              | <u>G</u>    | <u>G</u>            |
| 146            | T         | C       | <u>C</u>           | <u>C</u>            | <u>C</u>                | <u>C</u>    | <u>C</u>            | 11251          | A         | G       | <u>A</u>           | <u>G</u>            | <u>A/G</u>              | <u>A</u>    | <u>A</u>            |
| 150            | C         | T       | <u>C</u>           | <u>T</u>            | <u>C/T</u>              | <u>C</u>    | <u>C</u>            | 11299          | T         | C       | <u>C</u>           | <u>T</u>            | <u>C/T</u>              | <u>C</u>    | <u>C</u>            |
| 152            | T         | C       | <u>T</u>           | <u>C</u>            | <u>T/C</u>              | <u>C</u>    | <u>T/C</u>          | 11377          | G         | A       | <u>G</u>           | <u>A</u>            | <u>G/A</u>              | <u>G</u>    | <u>G</u>            |
| 195            | T         | C       | <u>T</u>           | <u>C</u>            | <u>T/C</u>              | <u>T</u>    | <u>T</u>            | 11467          | A         | G       | <u>G</u>           | <u>A</u>            | <u>G/A</u>              | <u>G</u>    | <u>G</u>            |
| 215            | A         | G       | <u>A</u>           | <u>G</u>            | <u>A/G</u>              | <u>A</u>    | <u>A</u>            | 11719          | G         | A       | <u>A</u>           | <u>A</u>            | <u>A</u>                | <u>A</u>    | <u>A</u>            |
| 263            | A         | G       | <u>G</u>           | <u>G</u>            | <u>G</u>                | <u>G</u>    | <u>G</u>            | 11818          | A         | G       | <u>A</u>           | <u>G</u>            | <u>A/G</u>              | <u>A</u>    | <u>A</u>            |
| 295            | C         | T       | <u>C</u>           | <u>T</u>            | <u>C/T</u>              | <u>C</u>    | <u>C</u>            | 11869          | C         | A       | <u>A</u>           | <u>C</u>            | <u>A/C</u>              | <u>C</u>    | <u>A/C</u>          |
| 319            | T         | C       | <u>T</u>           | <u>C</u>            | <u>T/C</u>              | <u>T</u>    | <u>T</u>            | 12308          | A         | G       | <u>G</u>           | <u>A</u>            | <u>G/A</u>              | <u>G</u>    | <u>G</u>            |
| 489            | T         | C       | <u>T</u>           | <u>C</u>            | <u>T/C</u>              | <u>T</u>    | <u>T</u>            | 12346          | C         | T       | <u>C</u>           | <u>C</u>            | <u>C</u>                | <u>T</u>    | <u>C/T</u>          |
| 513            | G         | A       | <u>G</u>           | <u>A</u>            | <u>G/A</u>              | <u>G</u>    | <u>G</u>            | 12372          | G         | A       | <u>A</u>           | <u>G</u>            | <u>A/G</u>              | <u>A</u>    | <u>A</u>            |
| 709            | G         | A       | <u>G</u>           | <u>G</u>            | <u>G</u>                | <u>A</u>    | <u>G/A</u>          | 12612          | A         | G       | <u>A</u>           | <u>G</u>            | <u>A/G</u>              | <u>A</u>    | <u>A</u>            |
| 750            | A         | G       | <u>G</u>           | <u>G</u>            | <u>G</u>                | <u>G</u>    | <u>G</u>            | 13135          | G         | A       | <u>A</u>           | <u>G</u>            | <u>A/G</u>              | <u>G</u>    | <u>A/G</u>          |
| 1438           | A         | G       | <u>G</u>           | <u>G</u>            | <u>G</u>                | <u>G</u>    | <u>G</u>            | 13708          | G         | A       | <u>G</u>           | <u>A</u>            | <u>G/A</u>              | <u>G</u>    | <u>G</u>            |
| 1811           | A         | G       | <u>G</u>           | <u>A</u>            | <u>G/A</u>              | <u>G</u>    | <u>G</u>            | 13722          | A         | G       | <u>A</u>           | <u>G</u>            | <u>A/G</u>              | <u>A</u>    | <u>A</u>            |
| 1850           | T         | C       | <u>T</u>           | <u>C</u>            | <u>T/C</u>              | <u>T</u>    | <u>T</u>            | 14037          | A         | G       | <u>G</u>           | <u>A</u>            | <u>G/A</u>              | <u>A</u>    | <u>G/A</u>          |
| 2217           | C         | T       | <u>T</u>           | <u>C</u>            | <u>T/C</u>              | <u>C</u>    | <u>T/C</u>          | 14133          | A         | G       | <u>A</u>           | <u>G</u>            | <u>A/G</u>              | <u>A</u>    | <u>A</u>            |
| 2706           | A         | G       | <u>G</u>           | <u>G</u>            | <u>G</u>                | <u>G</u>    | <u>G</u>            | 14167          | C         | T       | <u>T</u>           | <u>C</u>            | <u>T/C</u>              | <u>T</u>    | <u>T</u>            |
| 3447           | A         | G       | <u>A</u>           | <u>G</u>            | <u>A/G</u>              | <u>A</u>    | <u>A</u>            | 14766          | C         | T       | <u>T</u>           | <u>T</u>            | <u>T</u>                | <u>T</u>    | <u>T</u>            |
| 3480           | A         | G       | <u>G</u>           | <u>A</u>            | <u>G/A</u>              | <u>G</u>    | <u>G</u>            | 14798          | T         | C       | <u>C</u>           | <u>T</u>            | <u>C/T</u>              | <u>C</u>    | <u>C</u>            |
| 4216           | T         | C       | <u>T</u>           | <u>C</u>            | <u>T/C</u>              | <u>T</u>    | <u>T</u>            | 15257          | G         | A       | <u>G</u>           | <u>A</u>            | <u>G/A</u>              | <u>G</u>    | <u>G</u>            |
| 4561           | T         | C       | <u>T</u>           | <u>T</u>            | <u>T</u>                | <u>C</u>    | <u>T/C</u>          | 15326          | A         | G       | <u>G</u>           | <u>G</u>            | <u>G</u>                | <u>G</u>    | <u>G</u>            |
| 4769           | A         | G       | <u>G</u>           | <u>G</u>            | <u>G</u>                | <u>G</u>    | <u>G</u>            | 15452          | C         | A       | <u>C</u>           | <u>A</u>            | <u>C/A</u>              | <u>C</u>    | <u>C</u>            |
| 5231           | G         | A       | <u>A</u>           | <u>G</u>            | <u>A/G</u>              | <u>G</u>    | <u>A/G</u>          | 16066          | A         | G       | <u>A</u>           | <u>A</u>            | <u>A</u>                | <u>G</u>    | <u>A/G</u>          |
| 7028           | C         | T       | <u>T</u>           | <u>T</u>            | <u>T</u>                | <u>T</u>    | <u>T</u>            | 16069          | C         | T       | <u>C</u>           | <u>T</u>            | <u>C/T</u>              | <u>C</u>    | <u>C</u>            |
| 7476           | C         | T       | <u>C</u>           | <u>T</u>            | <u>C/T</u>              | <u>C</u>    | <u>C</u>            | 16126          | T         | C       | <u>T</u>           | <u>C</u>            | <u>T/C</u>              | <u>T</u>    | <u>T</u>            |
| 7789           | G         | A       | <u>G</u>           | <u>A</u>            | <u>G/A</u>              | <u>G</u>    | <u>G</u>            | 16145          | G         | A       | <u>G</u>           | <u>A</u>            | <u>G/A</u>              | <u>G</u>    | <u>G</u>            |
| 8292           | G         | A       | <u>G</u>           | <u>G</u>            | <u>G</u>                | <u>A</u>    | <u>G/A</u>          | 16222          | C         | T       | <u>T</u>           | <u>C</u>            | <u>T/C</u>              | <u>C</u>    | <u>T/C</u>          |
| 8860           | A         | G       | <u>G</u>           | <u>G</u>            | <u>G</u>                | <u>G</u>    | <u>G</u>            | 16224          | T         | C       | <u>C</u>           | <u>T</u>            | <u>C/T</u>              | <u>C</u>    | <u>C</u>            |
| 9055           | G         | A       | <u>A</u>           | <u>G</u>            | <u>A/G</u>              | <u>A</u>    | <u>A</u>            | 16231          | T         | C       | <u>T</u>           | <u>C</u>            | <u>T/C</u>              | <u>T</u>    | <u>T</u>            |
| 9698           | T         | C       | <u>C</u>           | <u>T</u>            | <u>C/T</u>              | <u>C</u>    | <u>C</u>            | 16261          | C         | T       | <u>C</u>           | <u>T</u>            | <u>C/T</u>              | <u>C</u>    | <u>C</u>            |
| 9716           | T         | C       | <u>C</u>           | <u>T</u>            | <u>C/T</u>              | <u>C</u>    | <u>C</u>            | 16270          | C         | T       | <u>T</u>           | <u>C</u>            | <u>T/C</u>              | <u>C</u>    | <u>T/C</u>          |
| 10398          | A         | G       | <u>A</u>           | <u>G</u>            | <u>A/G</u>              | <u>A</u>    | <u>A</u>            | 16311          | T         | C       | <u>C</u>           | <u>T</u>            | <u>C/T</u>              | <u>C</u>    | <u>C</u>            |
| 10499          | A         | G       | <u>A</u>           | <u>G</u>            | <u>A/G</u>              | <u>A</u>    | <u>A</u>            | 16519          | T         | C       | <u>C</u>           | <u>T</u>            | <u>C/T</u>              | <u>C</u>    | <u>C</u>            |
| Heteroplasmy % |           |         | 100                | 100                 | 70/30                   | 100         | 76/24               | Heteroplasmy % |           |         | 100                | 100                 | 70/30                   | 100         | 76/24               |
| Haplogroup     |           |         | <u>K2b1a1a</u>     | <u>J2a1a1a2</u>     | <u>K2b1a1a/J2a1a1a2</u> | <u>K2a7</u> | <u>K2b1a1a/K2a7</u> | Haplogroup     |           |         | <u>K2b1a1a</u>     | <u>J2a1a1a2</u>     | <u>K2b1a1a/J2a1a1a2</u> | <u>K2a7</u> | <u>K2b1a1a/K2a7</u> |

Entries labeled (D) represent deduced mtDNA genotypes. Haplogroup related nucleotides have been underlined in the table.
